# Supplementary material for: Reactions of α-diimine-aluminum complexes with sodium alkynides: versatile structures of aluminum σ-alkynide complexes
Source: Royal Society of Chemistry journal article supplement (doi:10.1039/c5dt01693b), 2015-01-01
Supplement: c5dt01693b1.pdf [file c5dt01693b1.pdf]

*Electronic supplementary information*

**Reactions of  $\alpha$ -Diimine-Aluminum Complexes with sodium alkynides:  
Versatile Structures of Aluminum  $\sigma$ -alkynide Complexes**

**Yanxia Zhao, Yanyan Liu, Biao Wu, Xiao-Juan Yang\***

*College of Chemistry and Materials Science, Northwest University, Xi'an, 710069, China*

**Table of Contents**

**S1. Experimental details**

**Synthesis**

**Figure S1.** Molecular structure of **6b**.

**Figure S2.** The EPR signal of compound **1** at room temperature.

**Table S1.** Crystal data and refinement details for compounds **1–10**.

**DFT computations**

**Figure S3.** Optimized structures of **1H**, **2H**, **4H**, **5H**, **6bH**, **6cH**, **8H** and **10H** selected bond orders.

**Figure S4.** Selected molecular orbitals for **4H**.

**Table S2.** Natural charges on the model compounds at the B3LYP/6-31G\* level.

**Table S3–S11.** Cartesian coordinates of the optimized geometry for **1H**, **2H**, **4H–6H**, **8H** and **10H**.

---

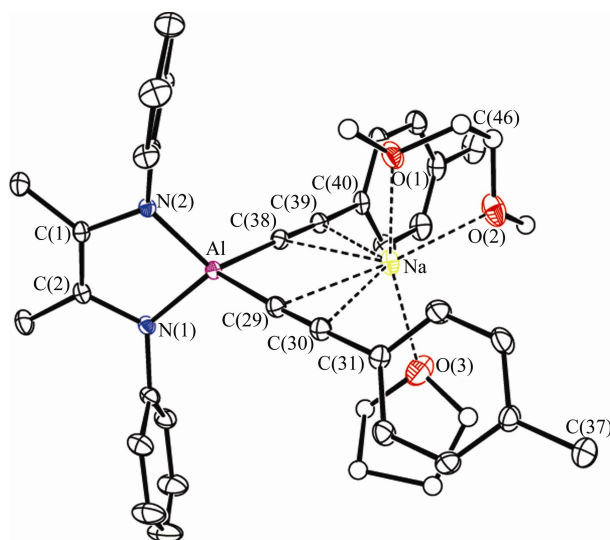

**Figure S1.** Molecular structure of **6b**. Thermal ellipsoids are set at the 30% probability level; hydrogen atoms and isopropyl groups of L are omitted for clarity. Selected bond lengths (Å) and bond angles (°): Al–N(1) 1.834(2), Al–N(2) 1.8346(19), Al–C(29) 1.972(3), Al–C(38) 1.987(2), C(29)–C(30) 1.214(3), C(38)–C(39) 1.207(3), Na–O(1) 2.332(2), Na–O(2) 2.334(2), Na–O(3) 2.325(2), N(1)–C(1) 1.433(3), N(2)–C(2) 1.427(3), C(1)–C(2) 1.347(3); N(1)–Al–N(2) 90.03(9), C(29)–Al–C(38) 100.74(10), C(31)–C(30)–C(29) 175.4(3), C(40)–C(39)–C(38) 176.8(3), Al–C(29)–C(30) 175.5(2), Al–C(38)–C(39) 178.6(2).

**Table S1.** Crystallographic data and refinement details for compounds **1** and **3–10**.

| compound                                     | <b>1</b>                                                         | <b>2</b>                                             | <b>4</b>                                                           | <b>2-5</b>                                                  |
|----------------------------------------------|------------------------------------------------------------------|------------------------------------------------------|--------------------------------------------------------------------|-------------------------------------------------------------|
| empirical formula                            | C <sub>28</sub> H <sub>40</sub> AlCl <sub>2</sub> N <sub>2</sub> | C <sub>32</sub> H <sub>48</sub> AlClN <sub>2</sub> O | C <sub>69</sub> H <sub>97</sub> Al <sub>2</sub> N <sub>4</sub> NaO | 2(C <sub>41</sub> H <sub>55</sub> AlN <sub>2</sub> O)·(THF) |
| Fw                                           | 502.50                                                           | 539.15                                               | 1075.46                                                            | 1309.80                                                     |
| crystal system                               | Orthorhombic                                                     | Orthorhombic                                         | Monoclinic                                                         | Monoclinic                                                  |
| space group                                  | <i>Pnma</i>                                                      | <i>Pbcn</i>                                          | <i>P2(1)/c</i>                                                     | <i>C2/c</i>                                                 |
| <i>a</i> /Å                                  | 12.542(2)                                                        | 26.279(3)                                            | 14.510(2)                                                          | 39.766(10)                                                  |
| <i>b</i> /Å                                  | 21.514(4)                                                        | 15.6114(17)                                          | 19.288(3)                                                          | 16.373(4)                                                   |
| <i>c</i> /Å                                  | 10.581(2)                                                        | 15.8183(17)                                          | 24.629(4)                                                          | 12.360(3)                                                   |
| $\alpha$ /°                                  | 90                                                               | 90                                                   | 90                                                                 | 90                                                          |
| $\beta$ /°                                   | 90                                                               | 90                                                   | 101.942(2)                                                         | 95.498(3)                                                   |
| $\gamma$ /°                                  | 90                                                               | 90                                                   | 90                                                                 | 90                                                          |
| <i>V</i> /Å <sup>3</sup>                     | 2855.0(9)                                                        | 6489.4(12)                                           | 6743.6(18)                                                         | 8011(4)                                                     |
| <i>Z</i>                                     | 4                                                                | 8                                                    | 4                                                                  | 4                                                           |
| <i>D</i> <sub>calc</sub> /g cm <sup>-3</sup> | 1.169                                                            | 1.104                                                | 1.059                                                              | 1.086                                                       |
| <i>F</i> (000)                               | 1076                                                             | 2336                                                 | 2336                                                               | 2848                                                        |
| $\mu$ /mm <sup>-1</sup>                      | 0.28                                                             | 0.17                                                 | 0.09                                                               | 0.09                                                        |
| $\theta$ range                               | 1.89–25.16                                                       | 1.52–25.11                                           | 1.78–25.09                                                         | 1.35–25.10                                                  |
| reflns collected                             | 18172                                                            | 41355                                                | 44436                                                              | 25831                                                       |
| independent reflns                           | 2630                                                             | 5787                                                 | 11886                                                              | 7050                                                        |
| observed reflns                              | 1558                                                             | 3830                                                 | 4597                                                               | 4142                                                        |
| <i>R</i> (int)                               | 0.100                                                            | 0.069                                                | 0.091                                                              | 0.078                                                       |

|                              |                |                |                |                |
|------------------------------|----------------|----------------|----------------|----------------|
| $R_1; wR_2 [I > 2\sigma(I)]$ | 0.0491, 0.1127 | 0.0478, 0.1147 | 0.0811, 0.1177 | 0.0877, 0.1734 |
| $R_1; wR_2$ (all data)       | 0.1070, 0.1430 | 0.0837, 0.1359 | 0.1969, 0.1386 | 0.1478, 0.1993 |
| GOF ( $F^2$ )                | 1.02           | 1.00           | 1.00           | 1.08           |

| compound                             | <b>6a</b>                | <b>6b</b>                             | <b>2·6c</b>                                    | <b>7</b>                                 |
|--------------------------------------|--------------------------|---------------------------------------|------------------------------------------------|------------------------------------------|
| empirical formula                    | $C_{52}H_{66}AlN_2NaO_2$ | $C_{54}H_{72}AlN_2NaO_3 \cdot C_7H_8$ | $2(C_{46}H_{76}AlN_2NaO_3Si_2) \cdot (C_7H_8)$ | $C_{48}H_{58}AlN_2NaO \cdot 0.5(C_7H_8)$ |
| Fw                                   | 801.04                   | 939.24                                | 1714.61                                        | 775.00                                   |
| crystal system                       | Monoclinic               | Monoclinic                            | Triclinic                                      | Monoclinic                               |
| space group                          | $P2(1)/c$                | $P2(1)/c$                             | $P-1$                                          | $P2(1)/n$                                |
| $a / \text{\AA}$                     | 15.589 (8)               | 17.619(4)                             | 12.6090(17)                                    | 15.289(7)                                |
| $b / \text{\AA}$                     | 15.119 (8)               | 15.448(3)                             | 19.913(3)                                      | 15.214(7)                                |
| $c / \text{\AA}$                     | 23.000 (12)              | 21.942(5)                             | 21.881(3)                                      | 22.131(10)                               |
| $\alpha / ^\circ$                    | 90                       | 90                                    | 79.478(2)                                      | 90                                       |
| $\beta / ^\circ$                     | 107.223 (7)              | 110.058                               | 86.486(2)                                      | 107.956(6)                               |
| $\gamma / ^\circ$                    | 90                       | 90                                    | 89.329(2)                                      | 90                                       |
| $V / \text{\AA}^3$                   | 5178 (4)                 | 5610(2)                               | 5391.4(13)                                     | 4897(4)                                  |
| Z                                    | 4                        | 4                                     | 2                                              | 4                                        |
| $D_{\text{calc}} / \text{g cm}^{-3}$ | 1.028                    | 1.112                                 | 1.056                                          | 1.061                                    |
| $F(000)$                             | 1728                     | 2032                                  | 1868                                           | 1684                                     |
| $\mu / \text{mm}^{-1}$               | 0.08                     | 0.09                                  | 0.13                                           | 0.09                                     |
| $\theta$ range                       | 1.37–25.03               | 1.23–25.09                            | 1.27–25.05                                     | 1.44–25.38                               |
| reflns collected                     | 25343                    | 34447                                 | 35871                                          | 31852                                    |
| independent reflns                   | 9091                     | 9860                                  | 18471                                          | 8832                                     |
| observed reflns                      | 3810                     | 6700                                  | 10463                                          | 4303                                     |
| $R(\text{int})$                      | 0.065                    | 0.068                                 | 0.1056                                         | 0.105                                    |
| $R_1; wR_2 [I > 2\sigma(I)]$         | 0.0849, 0.1607           | 0.0541, 0.1082                        | 0.0650, 0.1402                                 | 0.1320, 0.3015                           |
| $R_1; wR_2$ (all data)               | 0.1772, 0.1811           | 0.0901, 0.1239                        | 0.1292, 0.1736                                 | 0.2110, 0.3269                           |
| GOF ( $F^2$ )                        | 1.001                    | 1.00                                  | 1.01                                           | 1.14                                     |

| compound           | <b>8</b>                       | <b>9</b>              | <b>10</b>                                    |
|--------------------|--------------------------------|-----------------------|----------------------------------------------|
| empirical formula  | $C_{83}H_{124}Al_2N_4Na_2Si_4$ | $C_{44}H_{50}AlN_2Na$ | $C_{100}H_{156}Al_2N_4Na_2O_2 \cdot 2C_7H_8$ |
| Fw                 | 1390.17                        | 656.83                | 1730.50                                      |
| crystal system     | Monoclinic                     | Triclinic             | Orthorhombic                                 |
| space group        | $P2(1)/n$                      | $P-1$                 | $Pbca$                                       |
| $a / \text{\AA}$   | 12.8201(15)                    | 8.841(4)              | 19.7833 (17)                                 |
| $b / \text{\AA}$   | 32.219(4)                      | 12.395(6)             | 19.3362 (17)                                 |
| $c / \text{\AA}$   | 23.498(3)                      | 18.281(9)             | 28.545 (3)                                   |
| $\alpha / ^\circ$  | 90                             | 84.253(6)             | 90                                           |
| $\beta / ^\circ$   | 95.188(2)                      | 87.165(6)             | 90                                           |
| $\gamma / ^\circ$  | 90                             | 76.832(7)             | 90                                           |
| $V / \text{\AA}^3$ | 9666(2)                        | 1940.0(16)            | 10919.6 (16)                                 |
| Z                  | 4                              | 2                     | 4                                            |

|                                      |                |                |                |
|--------------------------------------|----------------|----------------|----------------|
| $D_{\text{calc}} / \text{g cm}^{-3}$ | 0.955          | 1.124          | 1.053          |
| $F(000)$                             | 3016           | 704            | 3792           |
| $\mu / \text{mm}^{-1}$               | 0.13           | 0.10           | 0.08           |
| $\theta$ range                       | 1.53–24.96     | 1.94–25.07     | 1.43–25.32     |
| reflns collected                     | 47526          | 12559          | 71292          |
| independent reflns                   | 16811          | 6682           | 9957           |
| observed reflns                      | 7899           | 3625           | 6778           |
| $R(\text{int})$                      | 0.081          | 0.060          | 0.072          |
| $R_1; wR_2 [I > 2\sigma(I)]$         | 0.0927, 0.1733 | 0.0612, 0.1332 | 0.0689, 0.1309 |
| $R_1; wR_2$ (all data)               | 0.1616, 0.1905 | 0.1201, 0.1597 | 0.1067, 0.1505 |
| GOF ( $F^2$ )                        | 1.08           | 1.00           | 1.001          |

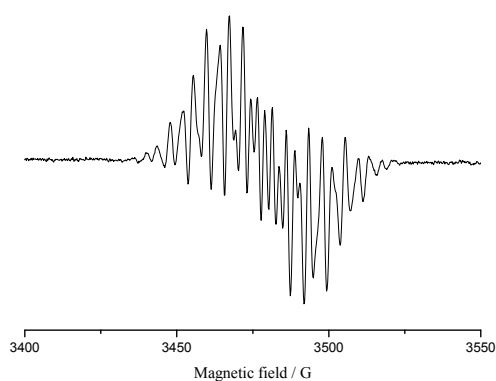

**Figure S2.** Room-temperature EPR spectrum of **1** recorded in THF solution.

### DFT computations

The model compounds  $[\text{L}'\text{AlCl}_2]$  (**1H**) and  $[\text{L}'\text{AlCl}(\text{THF})]$  (**2H**),  $[\text{Na}(\text{H}_2\text{O})][\text{L}'\text{Al}-\text{Al}(\text{C} \equiv \text{C}(\text{C}_6\text{H}_4-\text{Me}))\text{L}']$  (**4H**;  $\text{L}' = [\text{PhNCMe}]_2$ ),  $[\text{L}'\text{Al}(\text{C} \equiv \text{C}(\text{C}_6\text{H}_4-\text{Me}))]$  (**5H**),  $[\text{Na}(\text{THF})(\text{DME})][\text{L}'\text{Al}(\text{C} \equiv \text{C}(\text{C}_6\text{H}_4-\text{Me}))_2]$  (**6bH**) and  $[\text{Na}(\text{H}_2\text{O})_3][\text{L}'\text{Al}(\text{C} \equiv \text{CSi}(\text{Me})_3)_2]$  (**6cH**),  $[\text{Na}][(\mu-\text{Na})][\text{LAl}(\text{C} \equiv \text{CSi}(\text{Me})_3)_2]_2$  (**8H**) and  $[\text{Na}(\text{H}_2\text{O})_2][\text{L}'\text{Al}((\text{CH}=\text{C}(\text{C}_4\text{H}_9))(\text{C} \equiv \text{C}(\text{C}_4\text{H}_9))_2)]_2$  (**10H**), wherein the 2,6-diisopropylphenyl groups on the nitrogen atoms were replaced by phenyl groups and the THF and DME molecules by  $\text{H}_2\text{O}$  (except **6b**), were used for the products **1**, **2**, **4**, **5**, **6b**, **6c**, **8** and **10**, respectively. The structure optimization and NBO bonding analysis for the model compounds were carried out at the DFT (B3LYP) level with the 6-31G\* basis sets using the Gaussian 09 program.<sup>1</sup> The B3LYP method is a hybrid of the HF and DFT methods, incorporating Becke's three-parameter exchange functional (B3)<sup>2</sup> with the Lee, Yang, and Parr (LYP) correlation functional. Geometry optimizations gave bond distances that were in good agreement with the X-ray structures. All reported structural parameters refer to singlet ground state structures. Bonding analyses were performed by means of natural bond orbital (NBO) analysis and natural population analysis (NPA). Wiberg bond indices (WBI) were evaluated with Weinhold's natural bond orbital method.<sup>3</sup>

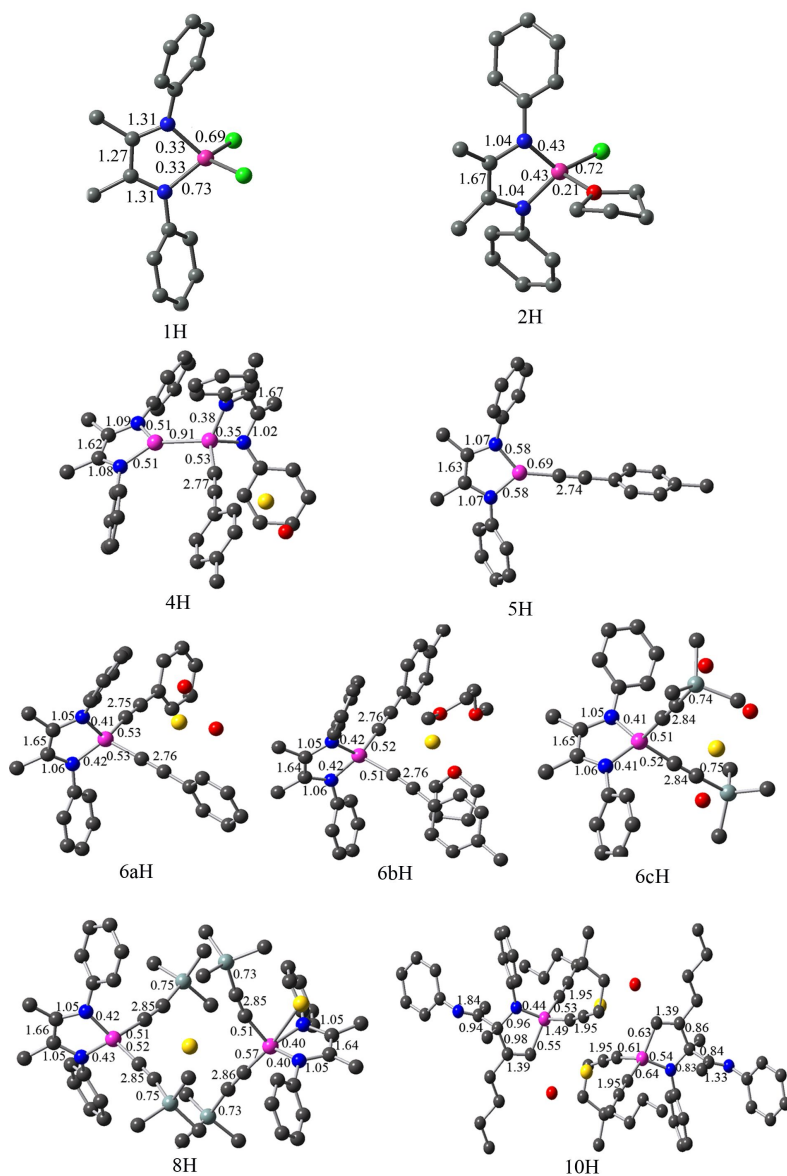

**Figure S3.** Optimized structures of **1H**, **2H**, **3H–6H**, **8H** and **10H** and their selected bond orders.

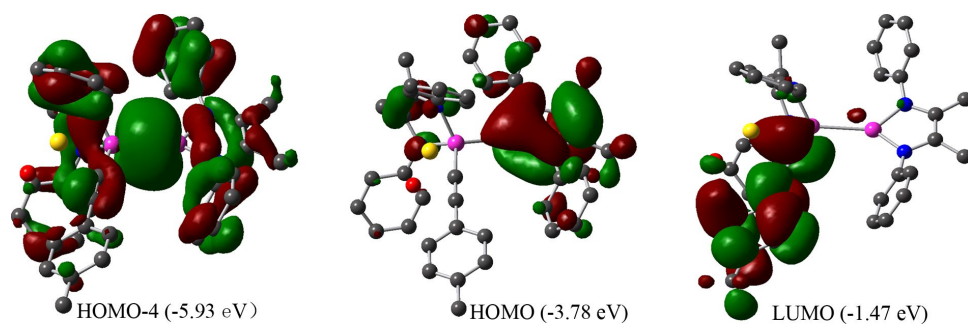

**Figure S4.** Al-Al bonding orbital (HOMO-4) of **4** ( $-5.93$  eV) and selected Kohn-Sham orbital representations for the model species  $[\text{Na}(\text{Et}_2\text{O})][\text{LA1-Al}(\text{C}\equiv\text{C}(\text{C}_6\text{H}_4\text{-Me}))\text{L}]$  (**4**).

**Table S2.** Natural charges of the model compounds **3H–6H**, **8H** and **10H** at B3LYP/6-31G\* level.

|         | <b>1H</b> | <b>2H</b> | <b>3H</b> | <b>4H</b>    | <b>5H</b> |
|---------|-----------|-----------|-----------|--------------|-----------|
| Al      | 1.67      | 1.86      | 1.13      | 1.17, 1.22   | 1.73      |
| L       | -0.57     | -1.42     | -1.79     | -1.25, -1.40 | -1.18     |
| alkynyl |           |           |           | -0.60        | -0.55     |

  

|         | <b>6aH</b>   | <b>6bH</b>    | <b>6cH</b>    | <b>8H</b>     | <b>10H</b> |
|---------|--------------|---------------|---------------|---------------|------------|
| Al      | 1.76         | 1.74          | 1.75          | 1.74, 1.73    | 1.63       |
| L       | -1.46        | -1.39         | -1.38         | -1.38, -1.36  | -0.68      |
| alkynyl | -0.50, -0.63 | -0.61, -0.61, | -0.61, -0.61, | -0.60, -0.60, | -0.56,     |
|         |              |               |               | -0.55, -0.58  | -0.58(av.) |

**Table S3.** Cartesian coordinates of the optimized geometry for **1H**.

|    |             |             |             |   |             |             |             |
|----|-------------|-------------|-------------|---|-------------|-------------|-------------|
| Al | -0.93661300 | 0.02488400  | 0.00000000  | C | 2.87266400  | -0.80139400 | -1.49638200 |
| Cl | -2.39299400 | -1.54995700 | 0.00000000  | H | 2.63053500  | -1.03894200 | -2.53334400 |
| Cl | -1.78636000 | 1.98077300  | 0.00000000  | H | 3.58697700  | 0.03267800  | -1.50421300 |
| N  | 0.43882500  | -0.21009300 | 1.30577600  | H | 3.39201200  | -1.66133000 | -1.06169200 |
| C  | 2.87266400  | -0.80139400 | 1.49638200  | C | 1.62973200  | -0.47346200 | -0.71287800 |
| H  | 2.63053500  | -1.03894200 | 2.53334400  | C | 0.27755200  | -0.02401200 | -2.70643400 |
| H  | 3.58697700  | 0.03267800  | 1.50421300  | C | 1.04493400  | 0.91469900  | -3.41406000 |
| H  | 3.39201200  | -1.66133000 | 1.06169200  | C | 0.82938100  | 1.11107500  | -4.77703200 |
| C  | 1.62973200  | -0.47346200 | 0.71287800  | H | 1.42641400  | 1.84469700  | -5.31196600 |
| C  | 0.27755200  | -0.02401200 | 2.70643400  | C | -0.15707100 | 0.38534400  | -5.44787200 |
| C  | 1.04493400  | 0.91469900  | 3.41406000  | H | -0.32607000 | 0.54456500  | -6.50898300 |
| C  | 0.82938100  | 1.11107500  | 4.77703200  | C | -0.93199800 | -0.53725500 | -4.74278200 |
| H  | 1.42641400  | 1.84469700  | 5.31196600  | H | -1.70608800 | -1.10333500 | -5.25335300 |
| C  | -0.15707100 | 0.38534400  | 5.44787200  | C | -0.72065800 | -0.74361400 | -3.38008800 |
| H  | -0.32607000 | 0.54456500  | 6.50898300  | H | 1.78745000  | 1.50600600  | 2.88658700  |
| C  | -0.93199800 | -0.53725500 | 4.74278200  | H | -1.31773300 | -1.46564800 | 2.83134900  |
| H  | -1.70608800 | -1.10333500 | 5.25335300  | H | 1.78745000  | 1.50600600  | -2.88658700 |
| C  | -0.72065800 | -0.74361400 | 3.38008800  | H | -1.31773300 | -1.46564800 | -2.83134900 |
| N  | 0.43882500  | -0.21009300 | -1.30577600 |   |             |             |             |

**Table S4.** Cartesian coordinates of the optimized geometry for **2H**.

|    |             |            |             |   |            |             |            |
|----|-------------|------------|-------------|---|------------|-------------|------------|
| Al | 0.00734800  | 0.36654700 | -0.48563900 | O | 0.01034700 | 2.18829200  | 0.17362400 |
| Cl | -0.00412300 | 0.75497100 | -2.58416400 | N | 1.33006100 | -0.52883400 | 0.41264900 |

|   |             |             |             |   |             |             |             |
|---|-------------|-------------|-------------|---|-------------|-------------|-------------|
| N | -1.30835500 | -0.53833100 | 0.41721700  | H | -5.41426800 | 0.66657300  | -1.22048300 |
| C | 0.69921000  | -1.29376200 | 1.44517500  | C | -5.14761700 | -1.47132200 | -1.11528600 |
| C | -0.66668900 | -1.30160100 | 1.44639500  | H | -6.13049100 | -1.70224200 | -1.51636400 |
| C | 1.57238800  | -1.78552900 | 2.57213200  | C | -4.26714900 | -2.49681900 | -0.76238900 |
| H | 1.00201200  | -2.32755700 | 3.32765500  | H | -4.55954200 | -3.53517300 | -0.90019600 |
| H | 2.07236300  | -0.94042300 | 3.06857200  | C | -3.00198800 | -2.20625800 | -0.25571400 |
| H | 2.36948400  | -2.44946800 | 2.22337100  | C | -0.06865900 | 3.45979400  | -0.56345600 |
| C | -1.53378700 | -1.80737900 | 2.57215200  | H | -1.06073400 | 3.51387000  | -1.01918600 |
| H | -0.96131200 | -2.36820400 | 3.31230900  | H | 0.68802800  | 3.43188500  | -1.34701100 |
| H | -2.33706400 | -2.45992400 | 2.21613200  | C | 0.15232400  | 4.52376200  | 0.50726700  |
| H | -2.02604400 | -0.97024900 | 3.08995200  | H | 1.22258800  | 4.71805200  | 0.63806800  |
| C | 2.62639600  | -0.82795000 | -0.05340400 | H | -0.33551000 | 5.46692500  | 0.24602200  |
| C | 3.07802500  | -2.14954800 | -0.23566600 | C | -0.43525300 | 3.87187300  | 1.77028000  |
| C | 4.35739800  | -2.40478500 | -0.72548400 | H | -1.52803500 | 3.95030200  | 1.77139300  |
| H | 4.68076100  | -3.43461800 | -0.85794700 | H | -0.05993500 | 4.31773600  | 2.69546100  |
| C | 5.21304000  | -1.35530300 | -1.06880200 | C | -0.00690600 | 2.41603200  | 1.62897400  |
| H | 6.20708100  | -1.55893800 | -1.45694100 | H | 1.00518200  | 2.22634900  | 1.99553100  |
| C | 4.76904900  | -0.04109900 | -0.91188000 | H | -0.69806300 | 1.68796300  | 2.05491800  |
| H | 5.42010400  | 0.78921100  | -1.17509800 | H | -2.30630400 | -3.00892200 | -0.02870700 |
| C | 3.49859800  | 0.21963600  | -0.40084900 | H | -3.19056600 | 1.18501600  | -0.26421400 |
| C | -2.59005400 | -0.87269900 | -0.06643400 | H | 2.40234300  | -2.97147900 | -0.01752100 |
| C | -3.48723100 | 0.15032100  | -0.42283500 | H | 3.17044600  | 1.24566600  | -0.24843000 |
| C | -4.74320600 | -0.14538600 | -0.95038200 |   |             |             |             |

**Table S5.** Cartesian coordinates of the optimized geometry for **4H**.

|    |             |             |             |   |             |             |             |
|----|-------------|-------------|-------------|---|-------------|-------------|-------------|
| Al | 1.85827500  | 1.33709000  | 0.44469600  | H | 3.24921400  | -3.88580800 | 1.64741600  |
| Al | 0.44383600  | -0.81619600 | 0.22672400  | C | 0.21825400  | -2.01536200 | -2.42091800 |
| Na | -2.39287400 | -1.63038500 | -2.00600400 | C | -0.32517900 | -3.20963400 | -2.98232800 |
| O  | -4.64058200 | -1.80490200 | -2.15881900 | C | -1.10048800 | -3.17711800 | -4.14394200 |
| N  | 0.89693600  | -1.97174200 | -1.23045800 | H | -1.49591900 | -4.11085800 | -4.53848400 |
| N  | 0.72882300  | -2.27781700 | 1.38264500  | C | -1.38764800 | -1.97000600 | -4.79540200 |
| N  | 3.67640600  | 1.64998600  | 0.32418600  | H | -1.97961400 | -1.95515900 | -5.70550300 |
| N  | 1.60564800  | 3.17308900  | 0.43446300  | C | -0.85283400 | -0.78431700 | -4.26461700 |
| C  | 1.51309700  | -3.14440000 | -0.67986400 | H | -1.03834700 | 0.16493200  | -4.76247900 |
| C  | 1.41969800  | -3.29110400 | 0.67161800  | C | -0.06823500 | -0.80131900 | -3.11326200 |
| C  | 2.49658900  | -3.88766500 | -1.55133800 | C | 0.00328800  | -2.54807900 | 2.54722300  |
| H  | 3.44114400  | -3.32906300 | -1.63090400 | C | -0.16709400 | -1.53226500 | 3.51160900  |
| H  | 2.12458000  | -4.02522800 | -2.57209000 | C | -0.92055900 | -1.74825900 | 4.66196300  |
| H  | 2.73140900  | -4.87780500 | -1.15112900 | H | -1.02853600 | -0.94336100 | 5.38555300  |
| C  | 2.24445600  | -4.28851500 | 1.45428400  | C | -1.51817200 | -2.98901700 | 4.90172600  |
| H  | 2.36654100  | -5.23521400 | 0.91994900  | H | -2.09558200 | -3.15967600 | 5.80614800  |
| H  | 1.79433700  | -4.50855600 | 2.42458300  | C | -1.35867300 | -4.00478600 | 3.95705100  |

|   |             |             |             |   |             |             |             |
|---|-------------|-------------|-------------|---|-------------|-------------|-------------|
| H | -1.82415600 | -4.97496600 | 4.11874200  | H | -2.70499600 | 4.01476700  | 1.74321800  |
| C | -0.62095400 | -3.79072700 | 2.79315400  | C | -0.67114800 | 3.60752900  | 1.18504100  |
| C | 3.95326400  | 3.03704200  | 0.32872300  | C | -1.49343500 | -0.36865100 | 0.11535800  |
| C | 2.85119500  | 3.84982700  | 0.38479000  | C | -2.67069500 | -0.01829600 | 0.18749900  |
| C | 5.38303800  | 3.50259400  | 0.42977700  | C | -4.04084700 | 0.39208900  | 0.25928000  |
| H | 5.44515900  | 4.52623500  | 0.80517800  | C | -4.44093900 | 1.66488300  | -0.19509900 |
| H | 5.91795200  | 3.47931200  | -0.52834000 | H | -3.68964000 | 2.35529000  | -0.56585000 |
| H | 5.94706700  | 2.86139500  | 1.11784800  | C | -5.78088500 | 2.04041000  | -0.15103100 |
| C | 2.88145300  | 5.34571000  | 0.56011200  | H | -6.06526500 | 3.02865500  | -0.50533200 |
| H | 2.18534000  | 5.65618200  | 1.34957500  | C | -6.77085800 | 1.17617900  | 0.33970600  |
| H | 2.59315300  | 5.89751400  | -0.34388300 | C | -6.37003900 | -0.08884800 | 0.79483000  |
| H | 3.87729600  | 5.69433800  | 0.84114900  | H | -7.11434100 | -0.77489700 | 1.19297600  |
| C | 4.65810100  | 0.67180100  | 0.05001900  | C | -5.03104200 | -0.47848200 | 0.76544100  |
| C | 4.76175400  | -0.45691000 | 0.88309000  | H | -4.73456000 | -1.45051400 | 1.15105900  |
| C | 5.66379100  | -1.48100900 | 0.59333700  | C | -8.21603400 | 1.60788300  | 0.41198100  |
| H | 5.72355400  | -2.34185100 | 1.25496100  | H | -8.89633400 | 0.75338600  | 0.33324800  |
| C | 6.49937200  | -1.39488900 | -0.52158900 | H | -8.46418500 | 2.31629900  | -0.38535600 |
| H | 7.20980100  | -2.18730600 | -0.74067100 | H | -8.43054200 | 2.10621600  | 1.36670300  |
| C | 6.40976200  | -0.27486400 | -1.35246700 | H | -5.07309100 | -1.34335900 | -1.41589800 |
| H | 7.04429000  | -0.19857300 | -2.23241700 | H | -5.17748900 | -1.60708600 | -2.94035200 |
| C | 5.49630400  | 0.74107800  | -1.07926500 | H | 4.13268900  | -0.51423000 | 1.76741000  |
| C | 0.37524900  | 3.84449000  | 0.27512800  | H | 5.40208100  | 1.58455000  | -1.75634200 |
| C | 0.12405600  | 4.70922000  | -0.80926200 | H | -0.48537500 | 2.95714000  | 2.03540300  |
| C | -1.11714400 | 5.32304700  | -0.96168100 | H | 0.90706000  | 4.87483200  | -1.54296400 |
| H | -1.28301500 | 5.98824700  | -1.80606600 | H | 0.35381200  | 0.12363400  | -2.72937100 |
| C | -2.14877800 | 5.07999000  | -0.04985400 | H | -0.15162500 | -4.15165900 | -2.47240600 |
| H | -3.11328900 | 5.56731700  | -0.16695700 | H | -0.53843100 | -4.57894500 | 2.04994200  |
| C | -1.91769600 | 4.21156000  | 1.01950900  | H | 0.32190600  | -0.57376200 | 3.35204500  |

**Table S6.** Cartesian coordinates of the optimized geometry for **5H**.

|    |             |             |             |   |             |             |             |
|----|-------------|-------------|-------------|---|-------------|-------------|-------------|
| Al | -0.81570800 | 0.00051900  | -0.00046900 | H | -4.82220600 | -2.10598100 | -0.73561800 |
| N  | -2.07091500 | 1.30077100  | -0.09714400 | H | -5.46486000 | -0.93348500 | 0.41902100  |
| N  | -2.07530500 | -1.29543000 | 0.09698500  | C | -1.88835200 | 2.70714000  | -0.05472900 |
| C  | -3.35607400 | 0.68738400  | -0.04299200 | C | -1.15310000 | 3.34108100  | -1.06884000 |
| C  | -3.35838000 | -0.67768300 | 0.04350300  | C | -0.90562400 | 4.71333100  | -1.01946500 |
| C  | -4.58337200 | 1.54952800  | -0.17193400 | H | -0.33136400 | 5.18241500  | -1.81431500 |
| H  | -5.46197300 | 0.95023000  | -0.41684100 | C | -1.40312200 | 5.48219700  | 0.03326700  |
| H  | -4.45294700 | 2.28294100  | -0.97704600 | H | -1.21735400 | 6.55211300  | 0.06779600  |
| H  | -4.81419600 | 2.12140000  | 0.73627800  | C | -2.13813200 | 4.86090900  | 1.04600100  |
| C  | -4.58857300 | -1.53565400 | 0.17285300  | H | -2.51955700 | 5.44616400  | 1.87903300  |
| H  | -4.45999600 | -2.27015000 | 0.97726000  | C | -2.37100800 | 3.48727800  | 1.01054400  |



|   |             |             |             |   |             |             |             |
|---|-------------|-------------|-------------|---|-------------|-------------|-------------|
| C | -1.89750900 | -2.70241200 | 0.05468000  | H | 6.36076200  | -0.07270500 | -2.14649000 |
| C | -1.16375600 | -3.33864900 | 1.06843700  | C | 6.54366000  | -0.01430000 | 0.00026900  |
| C | -0.92090100 | -4.71172400 | 1.01912300  | C | 5.82188600  | 0.01342600  | 1.20222600  |
| H | -0.34770300 | -5.18260600 | 1.81367600  | H | 6.35948000  | 0.02991500  | 2.14753500  |
| C | -1.42162200 | -5.47907600 | -0.03318600 | C | 4.43130900  | 0.01844400  | 1.20981500  |
| H | -1.23944200 | -6.54960900 | -0.06766900 | H | 3.88788100  | 0.03855000  | 2.14942100  |
| C | -2.15518100 | -4.85549100 | -1.04556000 | C | 8.05340700  | 0.01321200  | 0.00075000  |
| H | -2.53908400 | -5.43959700 | -1.87826100 | H | 8.43024800  | 1.04495800  | 0.00113800  |
| C | -2.38345100 | -3.48108400 | -1.01016600 | H | 8.46417400  | -0.48191500 | -0.88536000 |
| C | 1.06135500  | -0.00292300 | -0.00075800 | H | 8.46346000  | -0.48147000 | 0.88761700  |
| C | 2.28637600  | -0.00512600 | -0.00087800 | H | -2.90818800 | 3.00286700  | 1.82036200  |
| C | 3.71227300  | -0.00697200 | -0.00065000 | H | -0.79011900 | 2.74530700  | -1.90220900 |
| C | 4.43184900  | -0.03900400 | -1.21042400 | H | -0.79824000 | -2.74395400 | 1.90146800  |
| H | 3.88899200  | -0.06465100 | -2.15022400 | H | -2.91954000 | -2.99499600 | -1.81970200 |
| C | 5.82262800  | -0.04381200 | -1.20183200 |   |             |             |             |

**Table S7.** Cartesian coordinates of the optimized geometry for **6aH**.

|    |             |             |             |    |             |             |             |
|----|-------------|-------------|-------------|----|-------------|-------------|-------------|
| C  | 0.30291600  | 3.35443300  | 1.63396700  | C  | 2.44309000  | 0.23283500  | -2.62800600 |
| C  | 0.41394100  | 3.48911600  | 3.03273300  | C  | 1.38410800  | -2.37166600 | 1.85243700  |
| H  | 0.63865200  | 2.61060900  | 3.63084900  | C  | 2.88909200  | -2.39615900 | -0.11755100 |
| C  | 0.25779500  | 4.73440600  | 3.63697400  | C  | 3.68082100  | 0.90564700  | -2.72286500 |
| H  | 0.35008400  | 4.82361700  | 4.71611100  | C  | 1.40212200  | 0.66579000  | -3.47930100 |
| C  | -0.00752400 | 5.86590900  | 2.86160700  | C  | 0.44886600  | 2.07487600  | 1.00690900  |
| H  | -0.12589200 | 6.83631100  | 3.33570600  | C  | -0.25600000 | -3.07333000 | 3.54162800  |
| C  | -0.11131100 | 5.74605600  | 1.47339200  | H  | -1.25769900 | -3.43141200 | 3.77445900  |
| H  | -0.30604100 | 6.62487500  | 0.86445500  | C  | 2.33007100  | -2.25226600 | 2.89777600  |
| C  | 0.04152100  | 4.50434500  | 0.86119200  | C  | 1.58898200  | 1.71621300  | -4.37469400 |
| H  | -0.02244000 | 4.40918800  | -0.21886300 | H  | 0.76642200  | 2.01927300  | -5.01945600 |
| Al | 0.79124000  | -0.75396200 | -0.47833000 | C  | 0.58606800  | 0.98096700  | 0.46214900  |
| N  | 2.18087800  | -0.78594500 | -1.70638400 | C  | 1.99020100  | -2.54423500 | 4.21679600  |
| C  | 4.27367900  | -2.09646600 | -2.23208200 | H  | 2.74487900  | -2.43650400 | 4.99294900  |
| H  | 4.56317300  | -3.14610700 | -2.13105200 | C  | 3.86510600  | 1.94204600  | -3.63578100 |
| H  | 5.18464200  | -1.50020700 | -2.08962500 | H  | 4.83116300  | 2.44041300  | -3.68249700 |
| H  | 3.95433300  | -1.94171400 | -3.26840400 | C  | 0.69790200  | -2.95492000 | 4.55817600  |
| C  | 3.67405500  | -3.57455200 | 0.39785700  | H  | 0.44420600  | -3.19325500 | 5.58716100  |
| H  | 2.99497000  | -4.38220100 | 0.70166400  | C  | 2.82520400  | 2.36037200  | -4.46962600 |
| H  | 4.29555000  | -3.34433900 | 1.27326700  | H  | 2.97519100  | 3.17120200  | -5.17730700 |
| H  | 4.34510800  | -3.97347000 | -0.36611900 | Na | -1.91607200 | 0.60925200  | 0.88888900  |
| N  | 1.65439500  | -2.07107700 | 0.52229600  | C  | -1.09538700 | -1.10438600 | -0.98382700 |
| C  | 3.15317600  | -1.73663300 | -1.28521100 | C  | -2.29188100 | -1.21151300 | -1.24654000 |
| C  | 0.07600200  | -2.78437400 | 2.21425100  | C  | -3.68863500 | -1.28982400 | -1.54955900 |

|   |             |             |             |   |             |             |             |
|---|-------------|-------------|-------------|---|-------------|-------------|-------------|
| C | -6.44965000 | -1.37543000 | -2.09962100 | O | -3.74241600 | 1.71895600  | 0.08291400  |
| H | -7.51450600 | -1.41028500 | -2.31106400 | O | -1.99474400 | -0.37617600 | 2.92699500  |
| C | -5.88403800 | -2.27519800 | -1.19233200 | H | -1.82895000 | 0.13850100  | 3.73135600  |
| H | -6.50991000 | -3.01204500 | -0.69656100 | H | -1.33760300 | -1.10394100 | 2.96222100  |
| C | -4.51925900 | -2.23623300 | -0.91604000 | H | -3.67415800 | 2.60132900  | -0.31207600 |
| H | -4.07919100 | -2.93674300 | -0.21301500 | H | -4.19451300 | 1.17163100  | -0.58505200 |
| C | -5.63766000 | -0.43613400 | -2.74034700 | H | 4.48662900  | 0.62959700  | -2.05122600 |
| H | -6.06794900 | 0.25543100  | -3.45985000 | H | 0.45071200  | 0.13953200  | -3.44297500 |
| C | -4.26922100 | -0.39024900 | -2.47217600 | H | 3.32803500  | -1.89737700 | 2.66327800  |
| H | -3.62777900 | 0.31653900  | -2.99211000 | H | -0.65099600 | -2.93842900 | 1.41992600  |

**Table S8.** Cartesian coordinates of the optimized geometry for **6bH**.

|    |             |             |             |   |             |             |             |
|----|-------------|-------------|-------------|---|-------------|-------------|-------------|
| Al | -0.53414600 | 1.79673100  | -0.36099000 | H | 2.11761100  | 3.20295500  | 4.21335000  |
| Na | 0.93962300  | -1.16847300 | 0.42008700  | C | 0.07356000  | 3.49808000  | 4.84109500  |
| O  | 1.31815700  | -0.86985500 | 2.76337000  | H | 0.31147500  | 3.55458600  | 5.90013000  |
| O  | 2.69096000  | -2.63585300 | 1.16658100  | C | -1.24647100 | 3.63320200  | 4.40086100  |
| O  | 0.60077700  | -2.73024300 | -1.30744200 | H | -2.04714100 | 3.77551300  | 5.12376000  |
| N  | -1.57866400 | 2.56657900  | -1.69463800 | C | -1.55730300 | 3.57286900  | 3.04359400  |
| N  | -0.80848300 | 3.30071300  | 0.69915100  | C | -1.35185200 | 0.13122400  | 0.35381600  |
| C  | -2.08547200 | 3.81597800  | -1.22885500 | C | -1.95403900 | -0.87143200 | 0.73467300  |
| C  | -1.68475700 | 4.19781800  | 0.02102800  | C | -2.71967300 | -2.01508900 | 1.12730500  |
| C  | -2.79460900 | 4.70109100  | -2.22189800 | C | -3.93360000 | -2.31412400 | 0.47520400  |
| H  | -2.89734700 | 5.72426800  | -1.85626300 | H | -4.27965900 | -1.65843200 | -0.31804400 |
| H  | -3.80089000 | 4.35055200  | -2.48185500 | C | -4.67839200 | -3.43056500 | 0.84177900  |
| H  | -2.22923000 | 4.73783200  | -3.16358500 | H | -5.61148100 | -3.63955500 | 0.32297100  |
| C  | -1.89881400 | 5.56299000  | 0.62154900  | C | -4.25396400 | -4.28894300 | 1.86711600  |
| H  | -0.93661300 | 6.00268800  | 0.91953300  | C | -3.04594200 | -3.99148600 | 2.51176200  |
| H  | -2.52186000 | 5.54773500  | 1.52411200  | H | -2.69226500 | -4.64176300 | 3.30904900  |
| H  | -2.37451400 | 6.24696100  | -0.08308800 | C | -2.29036800 | -2.87713700 | 2.15503800  |
| C  | -2.15926400 | 1.86822900  | -2.75790700 | H | -1.35797900 | -2.66421200 | 2.67056900  |
| C  | -3.55536500 | 1.72944200  | -2.92857900 | C | -5.08884400 | -5.47757900 | 2.28086600  |
| C  | -4.08074900 | 0.99848700  | -3.99217400 | H | -5.87019400 | -5.18461900 | 2.99505100  |
| H  | -5.16060700 | 0.91298400  | -4.09599300 | H | -4.47927200 | -6.24825400 | 2.76425500  |
| C  | -3.24081800 | 0.36408700  | -4.91196700 | H | -5.59294600 | -5.93327300 | 1.42155300  |
| H  | -3.65599200 | -0.19980200 | -5.74309300 | C | 1.32799600  | 1.23108400  | -0.72147300 |
| C  | -1.85750300 | 0.47478200  | -4.74603800 | C | 2.50009300  | 0.90559200  | -0.90328800 |
| H  | -1.18520300 | 0.00230100  | -5.45995500 | C | 3.87536500  | 0.56509000  | -1.10505200 |
| C  | -1.32453900 | 1.21592700  | -3.69230100 | C | 4.30416100  | -0.06956800 | -2.28718900 |
| C  | -0.54772500 | 3.39127500  | 2.07129600  | H | 3.57634500  | -0.29201600 | -3.06190900 |
| C  | 0.77894000  | 3.24569800  | 2.53354400  | C | 5.64361400  | -0.40270300 | -2.46842000 |
| C  | 1.08133200  | 3.29681700  | 3.89350000  | H | 5.94989800  | -0.89080500 | -3.39109300 |

|   |             |             |             |   |             |             |             |
|---|-------------|-------------|-------------|---|-------------|-------------|-------------|
| C | 6.60629000  | -0.11598000 | -1.48990900 | H | 3.04672000  | -3.43512000 | -0.66020900 |
| C | 6.17717600  | 0.51618600  | -0.31386700 | H | 4.16959600  | -3.99907700 | 0.61954500  |
| H | 6.90393100  | 0.75368200  | 0.46007100  | C | -0.14323500 | -3.94690700 | -1.04666600 |
| C | 4.84088000  | 0.85497200  | -0.11971800 | H | -0.56709300 | -3.86365200 | -0.04167900 |
| H | 4.52990400  | 1.35634000  | 0.79230500  | H | 0.54758200  | -4.79903400 | -1.06550900 |
| C | 8.06381400  | -0.44484100 | -1.71024300 | C | -1.23136400 | -4.04940100 | -2.13642100 |
| H | 8.59059200  | 0.39148000  | -2.18917900 | H | -2.20572400 | -4.30969800 | -1.71427900 |
| H | 8.18537000  | -1.31803600 | -2.36010300 | H | -0.96650500 | -4.81795800 | -2.87124200 |
| H | 8.57720200  | -0.65074900 | -0.76486600 | C | -1.22175300 | -2.65317000 | -2.78566500 |
| C | 0.40082600  | -0.31158200 | 3.70777300  | H | -1.54153600 | -2.65985700 | -3.83090600 |
| H | -0.27980600 | 0.33217300  | 3.15209900  | H | -1.86449600 | -1.95763900 | -2.23806200 |
| H | 0.93391800  | 0.28729200  | 4.45526200  | C | 0.23504500  | -2.23881100 | -2.61601500 |
| C | 2.23645500  | -1.77799000 | 3.34981500  | H | 0.88190700  | -2.70539500 | -3.37499700 |
| H | 1.71123300  | -2.69185300 | 3.67109800  | H | 0.39897900  | -1.15929600 | -2.62125600 |
| H | 2.71204200  | -1.32910100 | 4.23543400  | H | -0.24868200 | 1.34002400  | -3.59367200 |
| C | 3.31194700  | -2.11799500 | 2.33690600  | H | -4.22024000 | 2.18012200  | -2.19830700 |
| H | 3.89925000  | -1.22323900 | 2.08128100  | H | 1.56895800  | 3.12434100  | 1.79711300  |
| H | 3.99278000  | -2.86523800 | 2.77367500  | H | -2.59152400 | 3.63845300  | 2.71983200  |
| C | 3.62775200  | -3.13372200 | 0.21229000  | H | -0.16763200 | -1.10693600 | 4.21135100  |
| H | 4.34707300  | -2.35678900 | -0.07698100 |   |             |             |             |

**Table S9.** Cartesian coordinates of the optimized geometry for **6cH**.

|    |             |             |             |   |             |             |             |
|----|-------------|-------------|-------------|---|-------------|-------------|-------------|
| Si | 2.92741200  | -1.15243900 | 3.24520300  | C | -2.45403500 | 1.87612500  | 1.40302100  |
| Si | -2.25591900 | -3.05883800 | -2.58289400 | C | -2.23027100 | 1.11774500  | 2.57993600  |
| Al | -0.23191100 | 0.90172400  | -0.15991200 | C | -3.28672400 | 0.72376800  | 3.40409700  |
| Na | -0.00381400 | -2.34641600 | 0.74335000  | H | -3.07499500 | 0.16780500  | 4.31611300  |
| O  | -2.13539300 | -2.05231400 | 1.59685700  | C | -4.60281600 | 1.07983300  | 3.09326500  |
| O  | 1.61464500  | -3.54463200 | -0.25758600 | H | -5.42432000 | 0.78211400  | 3.73836000  |
| O  | 3.22253100  | -1.44799700 | -0.75172500 | C | -4.83771300 | 1.83707200  | 1.94255000  |
| N  | -1.36449800 | 2.17206900  | 0.58432800  | H | -5.85506600 | 2.11775800  | 1.67914900  |
| N  | 0.47395100  | 2.18854500  | -1.29770100 | C | -3.79140100 | 2.22399900  | 1.10682100  |
| C  | -1.18064800 | 3.40286900  | -0.10894800 | C | 1.67571600  | 2.06103100  | -1.99051100 |
| C  | -0.19618300 | 3.42423100  | -1.05549500 | C | 1.89015300  | 0.89432700  | -2.76703700 |
| C  | -1.96218300 | 4.62231000  | 0.30985000  | C | 3.09656200  | 0.67647300  | -3.43545200 |
| H  | -1.41935100 | 5.53848000  | 0.06534400  | H | 3.21186700  | -0.21522200 | -4.04991300 |
| H  | -2.12044400 | 4.61652500  | 1.39462600  | C | 4.13139200  | 1.61505000  | -3.36460600 |
| H  | -2.95695200 | 4.69971400  | -0.15163800 | H | 5.06580500  | 1.45145800  | -3.89351600 |
| C  | 0.09656700  | 4.62091900  | -1.92701500 | C | 3.93229300  | 2.77251200  | -2.60771500 |
| H  | -0.78317300 | 5.26307000  | -2.01823200 | H | 4.72749500  | 3.51067300  | -2.53028400 |
| H  | 0.36802700  | 4.29535600  | -2.93749600 | C | 2.73680500  | 2.99354800  | -1.92666100 |
| H  | 0.92242600  | 5.25110000  | -1.56701600 | C | 1.04300600  | 0.06062700  | 1.12132500  |

|   |             |             |             |   |             |             |             |
|---|-------------|-------------|-------------|---|-------------|-------------|-------------|
| C | 1.77739700  | -0.45340700 | 1.97048500  | C | -1.75733900 | -4.66219100 | -1.70887700 |
| C | 2.67108900  | -0.23127700 | 4.87239000  | H | -0.66941600 | -4.71456400 | -1.58137800 |
| H | 2.86970300  | 0.83958800  | 4.75365800  | H | -2.07235100 | -5.53868800 | -2.28842400 |
| H | 3.34547200  | -0.61506600 | 5.64786200  | H | -2.22293400 | -4.73811800 | -0.71805200 |
| H | 1.64348700  | -0.34154000 | 5.23691900  | C | -1.50786900 | -2.99242700 | -4.31583600 |
| C | 2.50145400  | -2.98743500 | 3.45333500  | H | -1.75046300 | -2.04768400 | -4.81480200 |
| H | 1.48164200  | -3.11989600 | 3.83652900  | H | -1.88938200 | -3.81084800 | -4.93882600 |
| H | 3.18426400  | -3.47314900 | 4.16096700  | H | -0.41604500 | -3.07975800 | -4.27780800 |
| H | 2.57817200  | -3.51886100 | 2.49707300  | H | 2.15759400  | -4.30367200 | -0.00265800 |
| C | 4.69629700  | -0.95148000 | 2.61643200  | H | 2.25248300  | -2.84839200 | -0.57851300 |
| H | 4.81835700  | -1.38699700 | 1.61833500  | H | 3.20957400  | -0.89678800 | -1.55706800 |
| H | 5.41048700  | -1.43827700 | 3.29197300  | H | 2.84724800  | -0.86127600 | -0.06597500 |
| H | 4.96768200  | 0.10835100  | 2.55026700  | H | -2.34555900 | -1.30838300 | 2.19382900  |
| C | -1.10022000 | -0.66317300 | -1.01996600 | H | -2.44391900 | -1.72657300 | 0.72946300  |
| C | -1.57684600 | -1.63998900 | -1.60445500 | H | 2.62730000  | 3.87869700  | -1.31025500 |
| C | -4.13733800 | -2.90319900 | -2.65362800 | H | 1.07042500  | 0.18800500  | -2.87532800 |
| H | -4.57901100 | -2.93951900 | -1.65099900 | H | -1.20301200 | 0.89458500  | 2.85787900  |
| H | -4.57417000 | -3.72093700 | -3.24016000 | H | -4.00621500 | 2.77282700  | 0.19643500  |
| H | -4.44013400 | -1.95778100 | -3.11734400 |   |             |             |             |

**Table S10.** Cartesian coordinates of the optimized geometry for **8H**.

|    |             |             |             |   |            |             |             |
|----|-------------|-------------|-------------|---|------------|-------------|-------------|
| Si | 1.26839900  | 0.71438900  | 3.83864000  | H | 7.91395000 | -1.62363100 | 0.03597500  |
| Si | 0.46826400  | -0.90311900 | -4.34739600 | H | 8.42576000 | -0.37113000 | -1.09037800 |
| Si | -0.24504000 | -4.27192500 | 0.68357400  | C | 4.45562800 | 2.84390300  | -0.58976400 |
| Si | -1.54790900 | 4.37282200  | -0.72904400 | C | 5.11681100 | 3.62899600  | 0.38176400  |
| Al | 3.64919300  | 0.05115300  | -0.54771900 | C | 4.75807400 | 4.95691100  | 0.60078200  |
| Al | -3.23225700 | -0.26022500 | 0.19060000  | H | 5.28783300 | 5.53342400  | 1.35641800  |
| Na | 0.31355300  | -0.31615000 | -0.14868200 | C | 3.72052800 | 5.54769800  | -0.12551800 |
| Na | -4.70795000 | 2.11247700  | -0.04618700 | H | 3.44963100 | 6.58687400  | 0.04149100  |
| N  | 4.77737100  | 1.50550600  | -0.83468700 | C | 3.04373400 | 4.77824700  | -1.07646900 |
| N  | 5.13488000  | -1.05478400 | -0.37352500 | H | 2.24841100 | 5.22651100  | -1.66888400 |
| N  | -4.46934400 | 0.17015900  | 1.55708000  | C | 3.40277600 | 3.45085100  | -1.30761700 |
| N  | -4.71816400 | -0.24446000 | -0.98156600 | C | 5.17551200 | -2.28181100 | 0.30119200  |
| C  | 6.12984500  | 1.04677800  | -0.83891700 | C | 4.38185400 | -3.35433300 | -0.15545600 |
| C  | 6.31428500  | -0.28478600 | -0.60113600 | C | 4.37983700 | -4.58288300 | 0.50403700  |
| C  | 7.17811700  | 1.98423500  | -1.38348400 | H | 3.77011100 | -5.39557200 | 0.11449500  |
| H  | 8.16515600  | 1.52073200  | -1.41967600 | C | 5.17418000 | -4.78641500 | 1.63496800  |
| H  | 7.27306700  | 2.90426000  | -0.79662200 | H | 5.18317900 | -5.74888800 | 2.13965000  |
| H  | 6.91452300  | 2.29678800  | -2.40494400 | C | 5.96064500 | -3.73043100 | 2.10403100  |
| C  | 7.60033900  | -1.03698800 | -0.83421700 | H | 6.57462400 | -3.86436000 | 2.99228200  |
| H  | 7.47633800  | -1.75346000 | -1.65964200 | C | 5.95740900 | -2.49630600 | 1.45766900  |

|   |             |             |             |   |             |             |             |
|---|-------------|-------------|-------------|---|-------------|-------------|-------------|
| C | -5.81603100 | -0.03490900 | 1.10374800  | H | 0.76651400  | -1.65026200 | 4.44825000  |
| C | -5.94836700 | -0.25326000 | -0.24065300 | C | 2.27202800  | -0.36907900 | -1.92003500 |
| C | -6.94916600 | 0.10410400  | 2.08845300  | C | 1.44407300  | -0.59740700 | -2.80696300 |
| H | -6.80545900 | 0.97724700  | 2.73853400  | C | -0.72902900 | -2.33685100 | -4.06784400 |
| H | -7.03220700 | -0.76101800 | 2.75698600  | H | -0.18124000 | -3.26129000 | -3.85172100 |
| H | -7.91066500 | 0.21472900  | 1.58297600  | H | -1.34723600 | -2.50997600 | -4.95664400 |
| C | -7.25257600 | -0.38637100 | -0.98568700 | H | -1.40752400 | -2.14452200 | -3.22923000 |
| H | -8.10077400 | -0.07994500 | -0.36996500 | C | -0.46914900 | 0.68327200  | -4.78015700 |
| H | -7.44722300 | -1.41370200 | -1.31586400 | H | -1.17697400 | 0.95411300  | -3.98861000 |
| H | -7.25437700 | 0.22950900  | -1.89474800 | H | -1.03633700 | 0.56022600  | -5.71115600 |
| C | -4.17596300 | 0.09568800  | 2.94921900  | H | 0.22468100  | 1.52071300  | -4.91619800 |
| C | -3.53007100 | 1.16600400  | 3.58861800  | C | 1.68702100  | -1.32950600 | -5.72813300 |
| C | -3.22623900 | 1.11045200  | 4.95020100  | H | 2.40502700  | -0.51704600 | -5.88540100 |
| H | -2.72970400 | 1.95399100  | 5.42217900  | H | 1.16225400  | -1.50624200 | -6.67554900 |
| C | -3.56457800 | -0.01494600 | 5.70243700  | H | 2.25690900  | -2.23312800 | -5.48471000 |
| H | -3.33629900 | -0.05508400 | 6.76374500  | C | -1.98100300 | -1.73629800 | 0.32973200  |
| C | -4.19115300 | -1.09386900 | 5.07399100  | C | -1.22481700 | -2.70187100 | 0.45115200  |
| H | -4.44294200 | -1.98433400 | 5.64440600  | C | 0.63148600  | -4.65992200 | -0.94145500 |
| C | -4.48428000 | -1.04556000 | 3.71213000  | H | 1.31901900  | -3.85686700 | -1.22856100 |
| C | -4.69050500 | -0.75418800 | -2.31056100 | H | -0.09049000 | -4.79464200 | -1.75474800 |
| C | -4.17991400 | 0.03574200  | -3.35382700 | H | 1.21592500  | -5.58378100 | -0.85228600 |
| C | -4.13905800 | -0.44510100 | -4.66394800 | C | 0.96896400  | -4.01421500 | 2.10027000  |
| H | -3.74469300 | 0.18859700  | -5.45372500 | H | 0.43918700  | -3.77996700 | 3.03061500  |
| C | -4.61018400 | -1.72457300 | -4.96073900 | H | 1.67150100  | -3.19997600 | 1.89258800  |
| H | -4.58886100 | -2.09487600 | -5.98180600 | H | 1.56552700  | -4.91888800 | 2.26658800  |
| C | -5.10113200 | -2.52775400 | -3.92847400 | C | -1.49421600 | -5.62856600 | 1.10226100  |
| H | -5.45221500 | -3.53411600 | -4.14221600 | H | -0.98418000 | -6.58920900 | 1.24619700  |
| C | -5.13122100 | -2.05474300 | -2.61768700 | H | -2.22911900 | -5.75523300 | 0.29946300  |
| C | 2.52718900  | 0.21466900  | 1.08541900  | H | -2.03856400 | -5.39648700 | 2.02442300  |
| C | 1.89409400  | 0.37218000  | 2.13305200  | C | -2.21265000 | 1.40636600  | -0.18559900 |
| C | 0.28652700  | 2.33236700  | 3.80173500  | C | -1.87878400 | 2.57476000  | -0.40747400 |
| H | 0.91367900  | 3.15552400  | 3.44109500  | C | -3.26832800 | 5.18889000  | -0.64004500 |
| H | -0.07413800 | 2.59471100  | 4.80415900  | H | -3.94863500 | 4.78175800  | -1.40189300 |
| H | -0.58306700 | 2.25391300  | 3.13939200  | H | -3.20527700 | 6.26902700  | -0.81952300 |
| C | 2.76979300  | 0.89559900  | 4.97282900  | H | -3.72176100 | 5.05940700  | 0.35287700  |
| H | 3.36771200  | -0.02250900 | 4.97963900  | C | -0.82883200 | 4.57704100  | -2.45819600 |
| H | 2.46241800  | 1.10750000  | 6.00481300  | H | 0.13749000  | 4.06759500  | -2.53835500 |
| H | 3.41892700  | 1.71206300  | 4.63769900  | H | -0.66908800 | 5.63692900  | -2.69089200 |
| C | 0.18568400  | -0.72137900 | 4.41688800  | H | -1.49172100 | 4.15946100  | -3.22449900 |
| H | -0.67018900 | -0.88098600 | 3.75157600  | C | -0.42549500 | 5.08164800  | 0.60299400  |
| H | -0.21006100 | -0.53573800 | 5.42254400  | H | -0.79563300 | 4.84968100  | 1.60787500  |

|   |             |             |             |   |             |             |             |
|---|-------------|-------------|-------------|---|-------------|-------------|-------------|
| H | -0.36331300 | 6.17314800  | 0.50995700  | H | 6.54185100  | -1.67100200 | 1.85387900  |
| H | 0.59210300  | 4.68529000  | 0.51637400  | H | 2.90264900  | 2.86842600  | -2.07822800 |
| H | -5.48934500 | -2.69340200 | -1.81518500 | H | 5.89789000  | 3.16951900  | 0.98026900  |
| H | -3.81606600 | 1.03521900  | -3.12683500 | H | -4.94860100 | -1.89727600 | 3.22282100  |
| H | 3.79934000  | -3.21418100 | -1.06285000 | H | -3.26836600 | 2.04640100  | 3.00636900  |

**Table S11. Cartesian coordinates of the optimized geometry for 10H.**

|    |             |              |             |   |             |             |             |
|----|-------------|--------------|-------------|---|-------------|-------------|-------------|
| Al | -0.05682400 | -2.37760300  | -1.80232300 | C | -1.87056400 | -2.12177800 | -5.62156800 |
| Na | -0.11104700 | -1.30973400  | 1.32748300  | H | -2.17757500 | -3.10653300 | -6.00351000 |
| O  | 0.21174600  | -1.08870800  | 3.54893500  | H | -1.20368600 | -1.72452600 | -6.40067400 |
| N  | 0.71373200  | -3.45102000  | -3.08346200 | C | -3.10713900 | -1.22152600 | -5.52870000 |
| N  | -0.00436600 | -5.31803600  | -5.82662500 | H | -3.78612500 | -1.60163700 | -4.75316400 |
| C  | 0.09600200  | -3.33252100  | -4.42549500 | H | -2.81056800 | -0.21263800 | -5.20263900 |
| C  | -0.49657000 | -4.71155800  | -4.81566000 | C | -3.86360200 | -1.11158700 | -6.85919500 |
| C  | 1.12107400  | -2.86344400  | -5.47915600 | H | -4.17099900 | -2.11591300 | -7.18272300 |
| H  | 1.48514100  | -1.86601500  | -5.20781300 | H | -3.18134900 | -0.73913700 | -7.63651500 |
| H  | 0.69267400  | -2.82966900  | -6.48367200 | C | -5.09423300 | -0.20262900 | -6.77978500 |
| H  | 1.96861400  | -3.55025000  | -5.51759900 | H | -5.80917500 | -0.56750700 | -6.03214400 |
| C  | -1.61099100 | -5.26079700  | -3.94507400 | H | -5.61601300 | -0.15110500 | -7.74200700 |
| H  | -2.58731000 | -5.01215400  | -4.38106700 | H | -4.81575300 | 0.82075300  | -6.49823600 |
| H  | -1.57284300 | -4.83690900  | -2.94073400 | C | -0.85087200 | -3.23427200 | -0.19958900 |
| H  | -1.55522300 | -6.35116200  | -3.88340200 | C | -1.33533000 | -3.81733800 | 0.76694700  |
| C  | 1.84891300  | -4.28936800  | -2.91013100 | C | -1.90600600 | -4.58511100 | 1.88193700  |
| C  | 3.15475500  | -3.77683200  | -3.02422700 | H | -2.78516700 | -5.13803300 | 1.52050300  |
| C  | 4.27207300  | -4.58429000  | -2.80283600 | H | -2.27846400 | -3.89757900 | 2.65426600  |
| H  | 5.26917100  | -4.16139600  | -2.90234600 | C | -0.91138900 | -5.57934600 | 2.52506200  |
| C  | 4.11391800  | -5.92749900  | -2.45674600 | H | -0.04677400 | -5.02042200 | 2.91007300  |
| H  | 4.98320700  | -6.55688900  | -2.28469500 | H | -1.40428200 | -6.03306600 | 3.39589200  |
| C  | 2.82644800  | -6.45184100  | -2.32817800 | C | -0.42960000 | -6.67946900 | 1.57329700  |
| H  | 2.68823800  | -7.49347100  | -2.04734800 | H | -1.30069800 | -7.23564500 | 1.19816800  |
| C  | 1.71028300  | -5.64298800  | -2.54996900 | H | 0.04297900  | -6.21764100 | 0.69739400  |
| C  | -0.43798700 | -6.59673100  | -6.22875100 | C | 0.55173500  | -7.65113200 | 2.23631500  |
| C  | 0.28151400  | -7.73711400  | -5.83392500 | H | 1.44953200  | -7.12825800 | 2.58870400  |
| C  | -0.09361900 | -8.99816400  | -6.29490400 | H | 0.87562900  | -8.42794400 | 1.53485200  |
| H  | 0.46932300  | -9.87174700  | -5.97487600 | H | 0.09805700  | -8.15118900 | 3.10121300  |
| C  | -1.17689900 | -9.14531800  | -7.16455800 | C | 1.22855000  | -1.08066200 | -0.95757700 |
| H  | -1.46171000 | -10.12942400 | -7.52629300 | C | 2.18304600  | -0.47273700 | -0.47313600 |
| C  | -1.88428200 | -8.01195300  | -7.57020200 | C | 3.36841000  | 0.20002100  | 0.07824700  |
| H  | -2.72647600 | -8.11048000  | -8.25099900 | H | 3.99324500  | 0.55679500  | -0.75339100 |
| C  | -1.52059800 | -6.74661100  | -7.11001700 | H | 3.05727000  | 1.09527900  | 0.63108800  |
| C  | -1.31583000 | -1.69320400  | -3.16049100 | C | 4.21784700  | -0.70901100 | 0.99635000  |
| H  | -2.18188500 | -1.02886500  | -3.12400000 | H | 5.00232900  | -0.08795800 | 1.44915800  |
| C  | -1.07134400 | -2.31425400  | -4.33939000 | H | 3.58884000  | -1.06724400 | 1.82396500  |

|    |             |             |             |   |             |             |             |
|----|-------------|-------------|-------------|---|-------------|-------------|-------------|
| C  | 4.85368500  | -1.90262500 | 0.27532200  | H | 2.17757500  | 3.10653300  | 6.00351000  |
| H  | 5.50966300  | -1.52745900 | -0.52330400 | H | 1.20368600  | 1.72452600  | 6.40067400  |
| H  | 4.07284200  | -2.49037600 | -0.22252900 | C | 3.10713900  | 1.22152600  | 5.52870000  |
| C  | 5.65779100  | -2.80703800 | 1.21409200  | H | 3.78612500  | 1.60163700  | 4.75316400  |
| H  | 6.47214700  | -2.25729900 | 1.70252700  | H | 2.81056800  | 0.21263800  | 5.20263900  |
| H  | 6.10023600  | -3.64740800 | 0.66842400  | C | 3.86360200  | 1.11158700  | 6.85919500  |
| H  | 5.02026600  | -3.22510200 | 2.00360000  | H | 4.17099900  | 2.11591300  | 7.18272300  |
| Al | 0.05682400  | 2.37760300  | 1.80232300  | H | 3.18134900  | 0.73913700  | 7.63651500  |
| Na | 0.11104700  | 1.30973400  | -1.32748300 | C | 5.09423300  | 0.20262900  | 6.77978500  |
| O  | -0.21174600 | 1.08870800  | -3.54893500 | H | 5.80917500  | 0.56750700  | 6.03214400  |
| N  | -0.71373200 | 3.45102000  | 3.08346200  | H | 5.61601300  | 0.15110500  | 7.74200700  |
| N  | 0.00436600  | 5.31803600  | 5.82662500  | H | 4.81575300  | -0.82075300 | 6.49823600  |
| C  | -0.09600200 | 3.33252100  | 4.42549500  | C | 0.85087200  | 3.23427200  | 0.19958900  |
| C  | 0.49657000  | 4.71155800  | 4.81566000  | C | 1.33533000  | 3.81733800  | -0.76694700 |
| C  | -1.12107400 | 2.86344400  | 5.47915600  | C | 1.90600600  | 4.58511100  | -1.88193700 |
| H  | -1.48514100 | 1.86601500  | 5.20781300  | H | 2.78516700  | 5.13803300  | -1.52050300 |
| H  | -0.69267400 | 2.82966900  | 6.48367200  | H | 2.27846400  | 3.89757900  | -2.65426600 |
| H  | -1.96861400 | 3.55025000  | 5.51759900  | C | 0.91138900  | 5.57934600  | -2.52506200 |
| C  | 1.61099100  | 5.26079700  | 3.94507400  | H | 0.04677400  | 5.02042200  | -2.91007300 |
| H  | 2.58731000  | 5.01215400  | 4.38106700  | H | 1.40428200  | 6.03306600  | -3.39589200 |
| H  | 1.57284300  | 4.83690900  | 2.94073400  | C | 0.42960000  | 6.67946900  | -1.57329700 |
| H  | 1.55522300  | 6.35116200  | 3.88340200  | H | 1.30069800  | 7.23564500  | -1.19816800 |
| C  | -1.84891300 | 4.28936800  | 2.91013100  | H | -0.04297900 | 6.21764100  | -0.69739400 |
| C  | -3.15475500 | 3.77683200  | 3.02422700  | C | -0.55173500 | 7.65113200  | -2.23631500 |
| C  | -4.27207300 | 4.58429000  | 2.80283600  | H | -1.44953200 | 7.12825800  | -2.58870400 |
| H  | -5.26917100 | 4.16139600  | 2.90234600  | H | -0.87562900 | 8.42794400  | -1.53485200 |
| C  | -4.11391800 | 5.92749900  | 2.45674600  | H | -0.09805700 | 8.15118900  | -3.10121300 |
| H  | -4.98320700 | 6.55688900  | 2.28469500  | C | -1.22855000 | 1.08066200  | 0.95757700  |
| C  | -2.82644800 | 6.45184100  | 2.32817800  | C | -2.18304600 | 0.47273700  | 0.47313600  |
| H  | -2.68823800 | 7.49347100  | 2.04734800  | C | -3.36841000 | -0.20002100 | -0.07824700 |
| C  | -1.71028300 | 5.64298800  | 2.54996900  | H | -3.99324500 | -0.55679500 | 0.75339100  |
| C  | 0.43798700  | 6.59673100  | 6.22875100  | H | -3.05727000 | -1.09527900 | -0.63108800 |
| C  | -0.28151400 | 7.73711400  | 5.83392500  | C | -4.21784700 | 0.70901100  | -0.99635000 |
| C  | 0.09361900  | 8.99816400  | 6.29490400  | H | -5.00232900 | 0.08795800  | -1.44915800 |
| H  | -0.46932300 | 9.87174700  | 5.97487600  | H | -3.58884000 | 1.06724400  | -1.82396500 |
| C  | 1.17689900  | 9.14531800  | 7.16455800  | C | -4.85368500 | 1.90262500  | -0.27532200 |
| H  | 1.46171000  | 10.12942400 | 7.52629300  | H | -5.50966300 | 1.52745900  | 0.52330400  |
| C  | 1.88428200  | 8.01195300  | 7.57020200  | H | -4.07284200 | 2.49037600  | 0.22252900  |
| H  | 2.72647600  | 8.11048000  | 8.25099900  | C | -5.65779100 | 2.80703800  | -1.21409200 |
| C  | 1.52059800  | 6.74661100  | 7.11001700  | H | -6.47214700 | 2.25729900  | -1.70252700 |
| C  | 1.31583000  | 1.69320400  | 3.16049100  | H | -6.10023600 | 3.64740800  | -0.66842400 |
| H  | 2.18188500  | 1.02886500  | 3.12400000  | H | -5.02026600 | 3.22510200  | -2.00360000 |
| C  | 1.07134400  | 2.31425400  | 4.33939000  | H | -2.06344100 | -5.86353500 | -7.43656000 |
| C  | 1.87056400  | 2.12177800  | 5.62156800  | H | 1.13154800  | -7.61607200 | -5.16852400 |

|   |             |             |             |   |             |             |             |
|---|-------------|-------------|-------------|---|-------------|-------------|-------------|
| H | 3.27763600  | -2.72985400 | -3.28520600 | H | -3.27763600 | 2.72985400  | 3.28520600  |
| H | 0.71136800  | -6.05223100 | -2.43250600 | H | 0.89622000  | -1.50573500 | 4.09320500  |
| H | -1.13154800 | 7.61607200  | 5.16852400  | H | 0.33548600  | -0.12076400 | 3.68595000  |
| H | 2.06344100  | 5.86353500  | 7.43656000  | H | -0.33548600 | 0.12076400  | -3.68595000 |
| H | -0.71136800 | 6.05223100  | 2.43250600  | H | -0.89622000 | 1.50573500  | -4.09320500 |

## References

- [1] M. J. Frisch, G. W. Trucks, H. B. Schlegel, G. E. Scuseria, M. A. Robb, J. R. Cheeseman, J. A. Montgomery, Jr., T. Vreven, K. N. Kudin, J. C. Burant, J. M. Millam, S. S. Iyengar, J. Tomasi, V. Barone, B. Mennucci, M. Cossi, G. Scalmani, N. Rega, G. A. Petersson, H. Nakatsuji, M. Hada, M. Ehara, K. Toyota, R. Fukuda, J. Hasegawa, M. Ishida, T. Nakajima, Y. Honda, O. Kitao, H. Nakai, M. Klene, X. Li, J. E. Knox, H. P. Hratchian, J. B. Cross, V. Bakken, C. Adamo, J. Jaramillo, R. Gomperts, R. E. Stratmann, O. Yazyev, A. J. Austin, R. Cammi, C. Pomelli, J. W. Ochterski, P. Y. Ayala, K. Morokuma, G. A. Voth, P. Salvador, J. J. Dannenberg, V. G. Zakrzewski, S. Dapprich, A. D. Daniels, M. C. Strain, O. Farkas, D. K. Malick, A. D. Rabuck, K. Raghavachari, J. B. Foresman, J. V. Ortiz, Q. Cui, A. G. Baboul, S. Clifford, J. Cioslowski, B. B. Stefanov, G. Liu, A. Liashenko, P. Piskorz, I. Komaromi, R. L. Martin, D. J. Fox, T. Keith, M. A. Al-Laham, C. Y. Peng, A. Nanayakkara, M. Challacombe, P. M. W. Gill, B. Johnson, W. Chen, M. W. Wong, C. Gonzalez and J. A. Pople, Gaussian 03, Revision E.01, Gaussian, Inc., Wallingford CT, **2004**.
- [2] K. Fukui, *Acc. Chem. Res.*, **1981**, *12*, 363.
- [3] A. D. Becke, *J. Chem. Phys.*, **1993**, *98*, 5648.
